# Supplementary material for: Insight into S-adenosylmethionine biosynthesis from the crystal structures of the human methionine adenosyltransferase catalytic and regulatory subunits
Source: PubMed Central journal article supplement (PMC3793261; doi:10.1042/bj20121580), 2013-04-25
Supplement: bj4520027add.pdf [file bj4520027add.pdf]

## SUPPLEMENTARY ONLINE DATA

**Insight into S-adenosylmethionine biosynthesis from the crystal structures of the human methionine adenosyltransferase catalytic and regulatory subunits**

Naeem SHAFQAT\*, Joao R. C. MUNIZ\*, Ewa S. PILKA\*, Evangelos PAPAGRIGORIOU\*, Frank von DELFT\*, Udo OPPERMANN\*†<sup>1</sup> and Wyatt W. YUE\*<sup>1</sup>

\*Structural Genomics Consortium, University of Oxford, Oxford OX3 7DQ, U.K., and †Botnar Research Centre, NIHR Oxford Biomedical Research Unit, University of Oxford, Oxford OX3 7LD, U.K.

See the following pages for Supplementary Figures S1–S5 and Supplementary Tables S1 and S2.

<sup>1</sup> Correspondence may be addressed to either of these authors (email udo.oppermann@sgc.ox.ac.uk or wyatt.yue@sgc.ox.ac.uk).

The atomic co-ordinates and structure factors have been deposited in the PDB under accession codes 2OBV (hMAT1A), 2P02 (hMAT2A), 2YDY (hMAT2B<sub>subt</sub>) and 2YDX (hMAT2B<sub>resv</sub>).

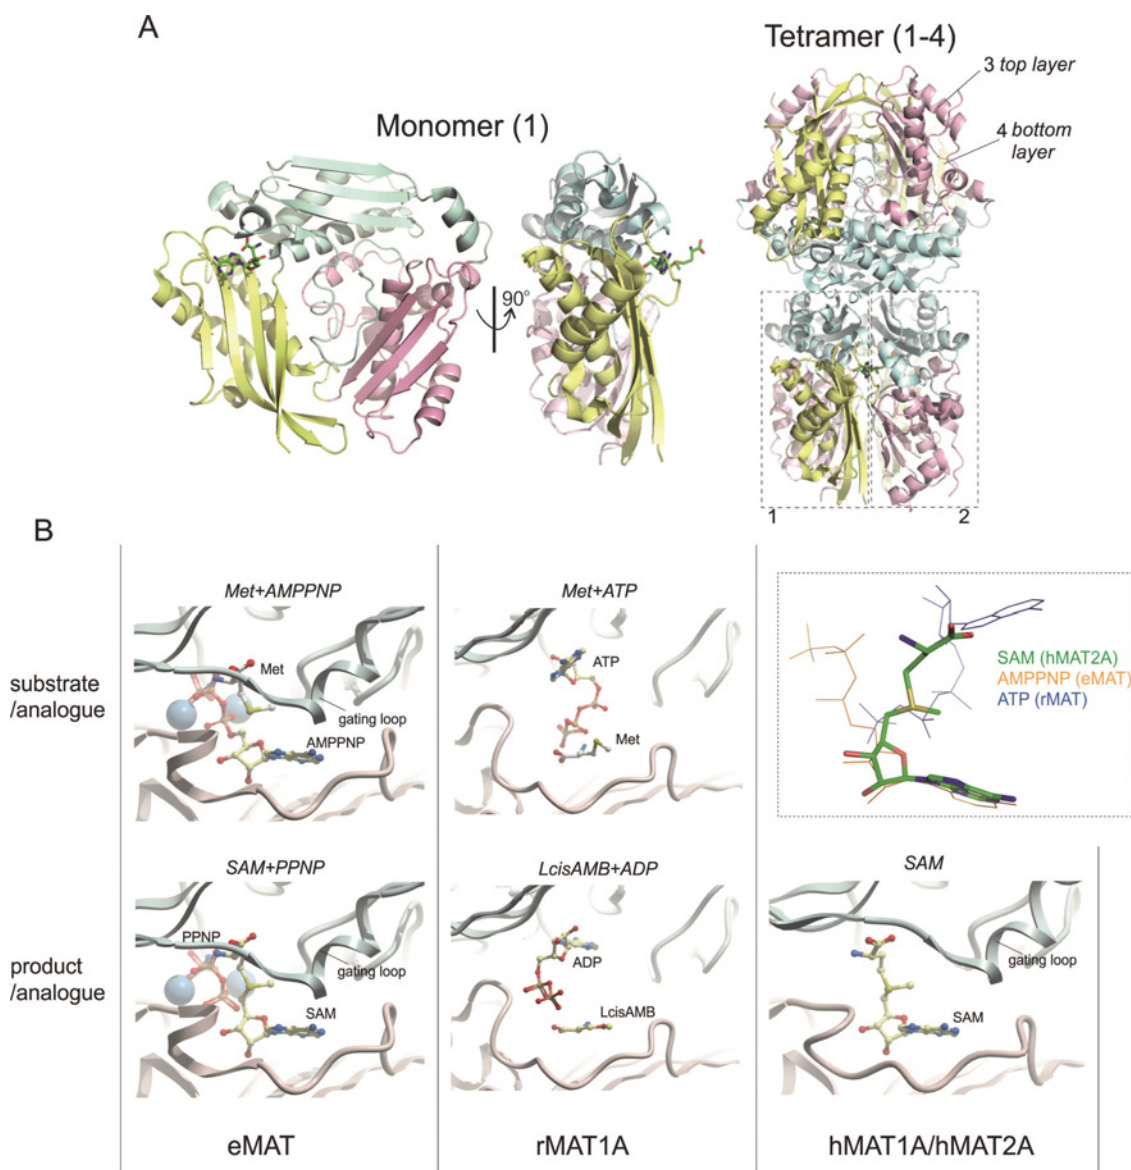

**Figure S1 Crystal structures of hMAT1A/hMAT2A**

(A) Left-hand panel, structure of the hMAT2A monomer in orthogonal views, coloured yellow for the N-domain, cyan for the central domain and pink for the C-domain. Right-hand panel, tetrameric assembly of hMAT2A showing two tightly packed dimers (1 and 2 and 3 and 4). In a dimer, the two active sites are located at the interface between two tightly packed monomers that are burying ~20% of the total accessible surface. Two dimers in turn form an elongated tetramer via less extensive interactions. (B) Substrate or product orientation in the active site. Interaction of substrates/analouges (upper panels) and products/analouges (lower panels) in the active-site pocket of eMAT, rMAT1A and hMAT1A/hMAT2A. The top subunit of the dimer is coloured cyan and the bottom subunit pink. The co-crystallized ligands from each structure are shown above the figure. Inset, superimposition of ATP, AMP-PNP and SAM from the structures of rMAT (PDB code 1O9T), eMAT (PDB code 1P7L) and hMAT2A (the present study) respectively.

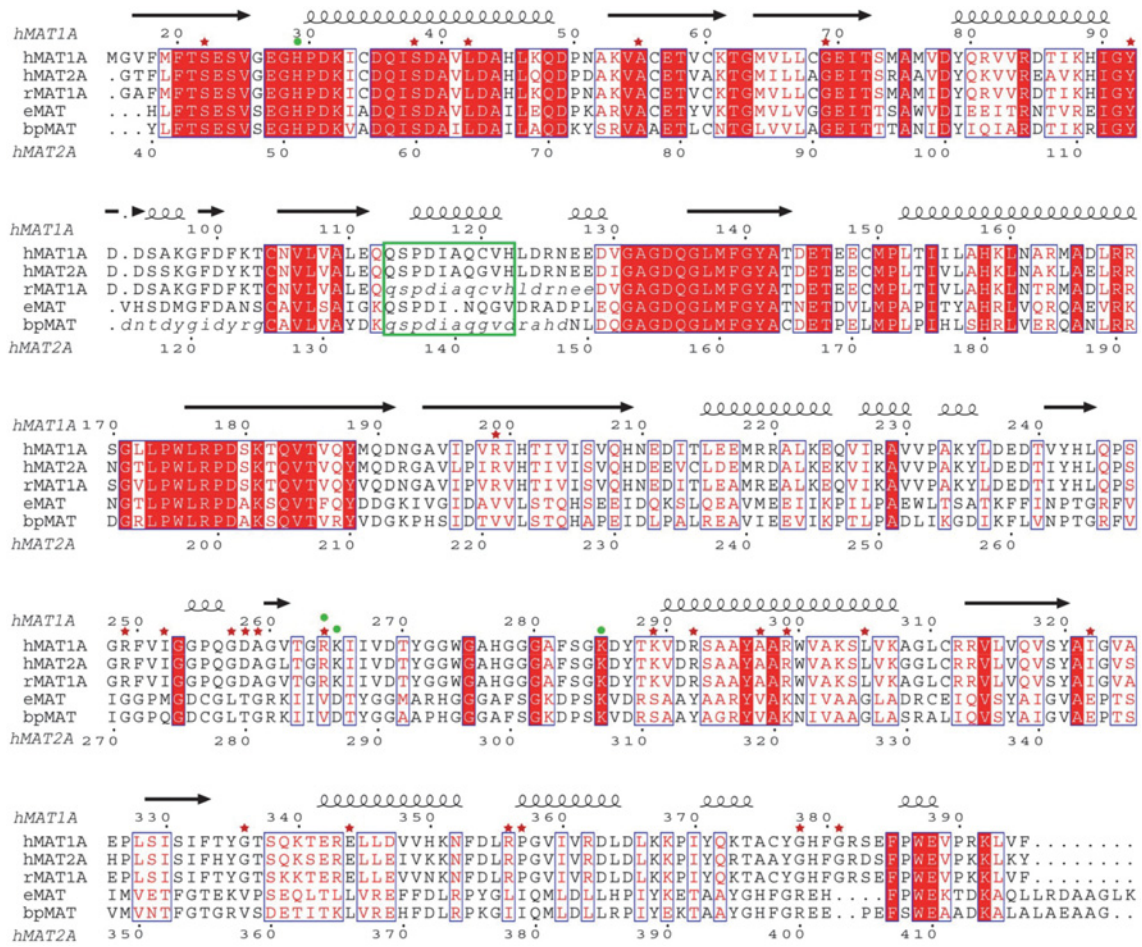

**Figure S2 Structure-based sequence alignment of the MAT enzymes**

The aligned sequences include hMAT1A (PDB code 2OBV; Uniprot ID Q00266), hMAT2A (PDB code 2P02; Uniprot ID P31153), rMAT1A (PDB code 1O9T; Uniprot ID P13444), eMAT (PDB code 1RG; Uniprot ID P0A817) and *Burkholderia pseudomallei* MAT (PDB code 3IML; Uniprot ID Q63YH5). Residue numbering and secondary structure elements for hMAT1A are shown above the aligned sequences. Residue numbering for hMAT2A is shown below the sequences. The conserved catalytic residues (Lys<sup>265</sup>, Lys<sup>285</sup>, Asp<sup>134</sup>, Phe<sup>250</sup> and His<sup>29</sup>) mentioned in the main text are indicated in green circles. The gating loop is marked with green box. Residues with known clinical mutations in hMAT1A are marked with red stars. Residues that are not modelled in the crystal structures (presumably disordered) are shown in italics.

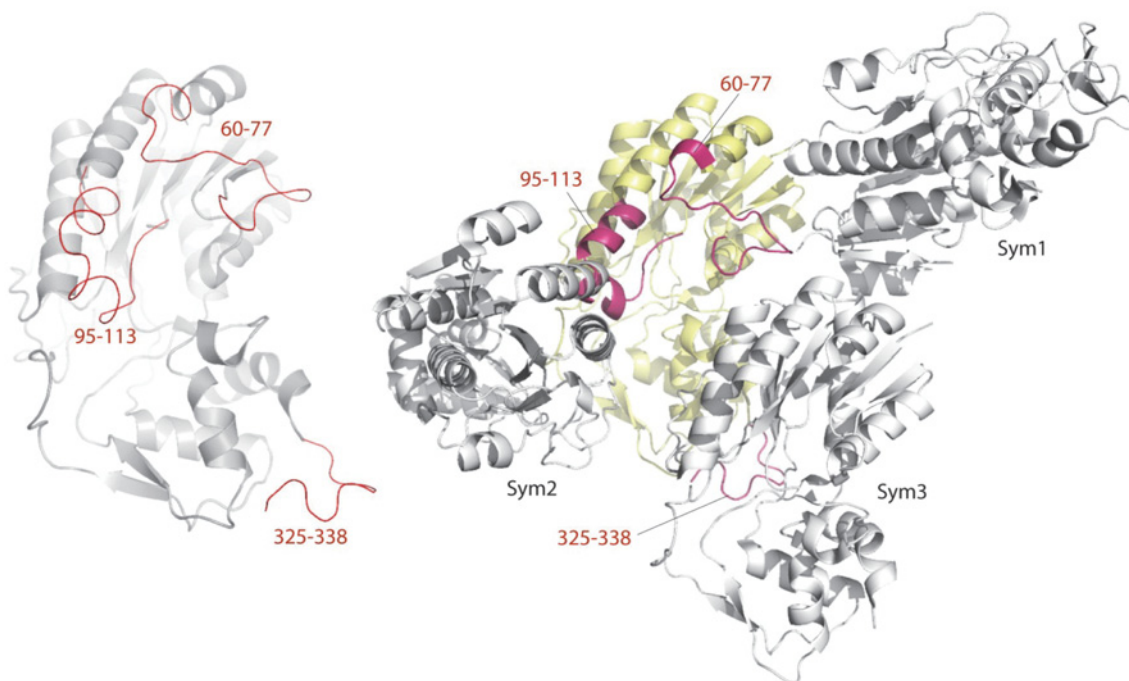

**Figure S3 Crystal packing in the subtilisin-treated hMAT2B protein**

Left-hand panel, the crystal structure of hMAT2B<sub>subtl</sub> (grey) which reveals the absence of three loop regions (shown as an overlay from the hMAT2B<sub>resv</sub> structure; red). Right-hand panel, packing of crystallographic symmetry-related molecules (Sym1–3) of each hMAT2B<sub>subtl</sub> protomer (yellow) was mediated by the absence of the three loop regions (shown as an overlay from the hMAT2B<sub>resv</sub> structure).

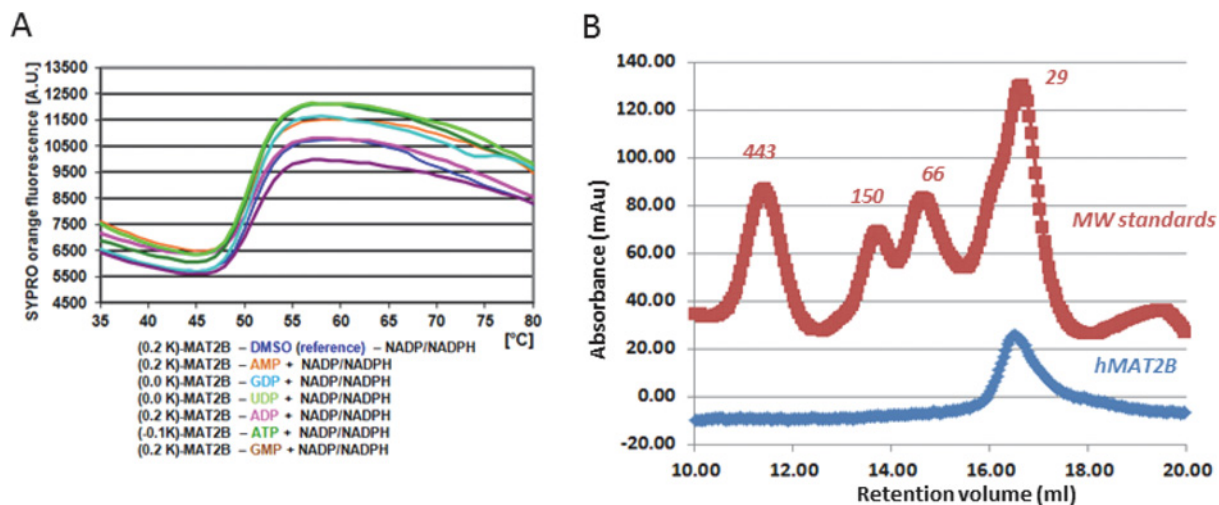

**Figure S4 Solution studies of full-length hMAT2B**

(A) Thermal stability assay of hMAT2B in the presence of various nucleotide sugars by DSF (B) Size-exclusion chromatography of hMAT2B in solution, demonstrating a monomeric species. Elution peaks of molecular mass standards are shown in red.

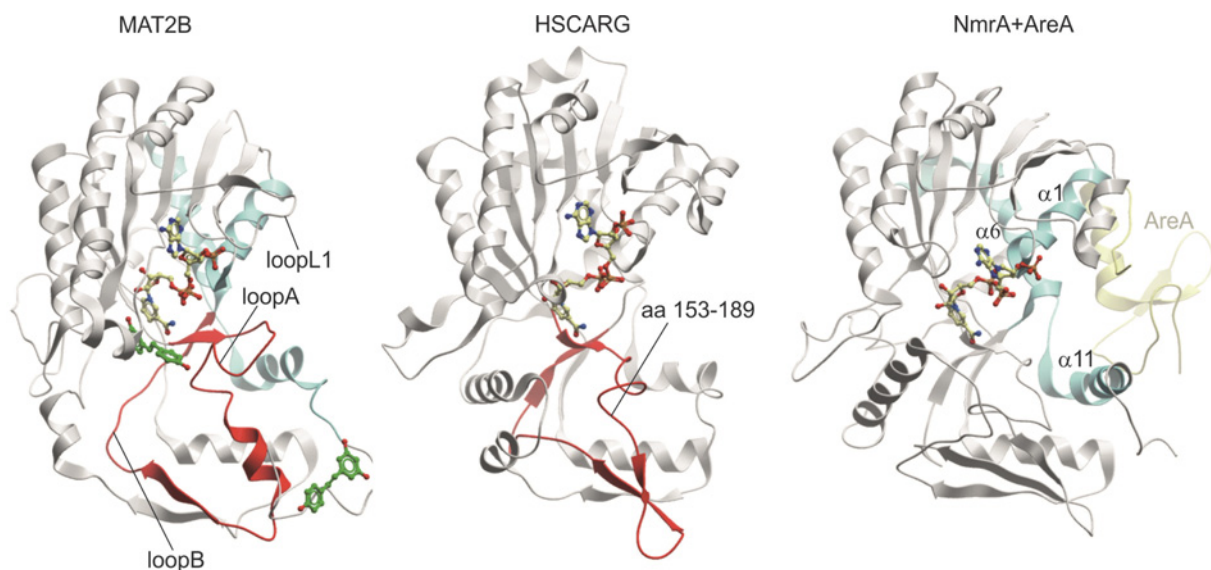

**Figure S5 Mapping putative interaction sites on hMAT2B**

The contact sites of two SDR homologues (red in HSCARG and cyan in NmrA) with their interaction partners [ASS1 (argininosuccinate synthase 1) and AreA respectively] are mapped on to the structure of hMAT2B. The PDB codes for the HSCARG–NADP and NmrA–NADP–AreA structures are 2EXX and 2VUU.

**Table S1 Comparison of the MAT catalytic subunit structures determined to date**

AEP, (2S,4S)-amino-4,5-epoxy-pentanoic acid; AMB, L-2-amino-4-methoxy-cis-but-3-enoic acid; 8-Br-ADP, 8-bromo-ADP.

| Organism                          | Name   | PDB code | Resolution (Å) | Active site ligands             | Gating loop* | References        |
|-----------------------------------|--------|----------|----------------|---------------------------------|--------------|-------------------|
| <i>Burkholderia pseudomallei</i>  |        | 3IML     | 2.35           |                                 | Disordered   | Not published     |
| <i>Entamoeba histolytica</i>      |        | 3S04     | 3.18           |                                 | Disordered   | Not published     |
| <i>Mycobacterium marinum</i>      |        | 3RV2     | 2.00           |                                 | Disordered   | Not published     |
| <i>Mycobacterium avium</i>        |        | 3S82     | 1.73           |                                 | Disordered   | Not published     |
| <i>Mycobacterium tuberculosis</i> |        | 3TDE     | 1.85           |                                 | Disordered   | Not published     |
| <i>E. coli</i>                    | eMAT   | 1P7L     | 2.50           | AMP-PNP, Met                    | Ordered      | [1]               |
|                                   |        | 1RG9     | 2.50           | SAM, PPNP                       | Ordered      | [1]               |
|                                   |        | 1FUG     | 3.20           |                                 | Disordered   | [2]               |
|                                   |        | 1MXA     | 2.80           | PP <sub>i</sub>                 | Disordered   | [3]               |
|                                   |        | 1MXB     | 2.80           | ADP                             | Disordered   | [3]               |
|                                   |        | 1MXC     | 3.00           | 8-Br-ADP                        | Disordered   | [3]               |
| Rat                               | rMAT1A | 1XRA     | 3.00           |                                 | Disordered   | [4]               |
|                                   |        | 1O90     | 3.10           | AEP and PO <sub>4</sub>         | Disordered   | [5]               |
|                                   |        | 1O92     | 3.19           | ADP and AMB and 3P <sub>i</sub> | Disordered   | [5]               |
|                                   |        | 1O93     | 3.49           | ATP, AEP and 2P <sub>i</sub>    | Disordered   | [5]               |
|                                   |        | 1O9T     | 2.90           | ATP, Met and 2P <sub>i</sub>    | Disordered   | [5]               |
| Human                             | hMAT1A | 1QM4     | 2.66           | AMB and 2SO <sub>4</sub>        | Disordered   | [6]               |
|                                   |        | 2OBV     | 2.05           | SAM                             | Ordered      | The present study |
|                                   | hMAT2A | 2P02     | 1.21           | SAM                             | Ordered      | The present study |

\*Conformation of the gating loop as observed in the crystal structure

**Table S2 List of the clinical mutations identified for the hMAT1A gene**

Activity is the percentage of mutant activity compared with the wild-type activity. n.r., not reported.

| Amino acids      | Nucleotides | Predicted consequence       | Activity (%) | Reference(s) |
|------------------|-------------|-----------------------------|--------------|--------------|
| <b>Missense</b>  |             |                             |              |              |
| S22L             | 65C>T       | Steric hindrance            | ~52          | [7,8]        |
| S38N             | 113G>A      | Steric hindrance            | None         | [9]          |
| L42P             | 125T>C      | Disrupt helix               | ~10          | [7,8]        |
| A55D             | 164C>A      | Disrupt SAM pocket          | 17.2         | [10]         |
| G69S             | 205G>A      | Disrupt SAM pocket          | ~100         | [8,11]       |
| Y92H             | 274T>C      | Disrupt polar interaction   | ~100         | [8,12]       |
| R199C            | 595C>T      | Disrupt salt bridge         | 11.1         | [13]         |
| R249W            | 745C>T      | Affect dimer interface      | ~18          | [8,11]       |
| I252T            | 755T>C      | Affect dimer interface      | ~24          | [8]          |
| G257R            | 769G>A      | Affect dimer interface      | ~10          | [8]          |
| D258G            | 773A>G      | Disrupt SAM pocket          | ~5           | [8]          |
| A259V            | 776C>T      | Affect dimer interface      | ~13          | [8]          |
| R264H            | 791G>A      | Affect dimer interface      | 0.1          | [9,14]       |
| R264C            | 791C>T      | Affect dimer interface      | 0.3          | [9]          |
| K289N            | 867G>T      | Disrupt ionic interaction   | ~5           | [8,11]       |
| R292C            | 874C>T      | Disrupt ionic interaction   | ~18          | [13,15]      |
| A297D            | 890C>A      | Steric clash core           | ~25          | [8]          |
| R299H            | 896G>A      | Disrupt ionic interaction   | ~17          | [8]          |
| R299C            | 895C>T      | Disrupt ionic interaction   | ~25          | [8]          |
| L305P            | 914T>C      | Disrupt helix               | 26           | [10]         |
| I322V            | 964A>G      | Disrupt SAM pocket          | ~1           | [8]          |
| I322M            | 966T>G      | Disrupt SAM pocket          | 45.8         | [9]          |
| G336R            | 1006G>A     | Steric hindrance            | 22.9         | [9]          |
| E344A            | 1031A>C     | Not known                   | 12.1         | [9]          |
| R356P            | 1067G>C     | Disrupt ionic interaction   | ~10          | [8,11]       |
| R356Q            | 1068G>A     | Disrupt ionic interaction   | 53.1         | [13]         |
| R356W            | 1068C>T     | Disrupt ionic interaction   | ~3           | [8]          |
| P357L            | 1070C>T     | Steric hindrance            | 31           | [10]         |
| G378S            | 1132G>A     | Disrupt $\beta$ -turn       | 0.17         | [13]         |
| G381R            | 1141G>A     | Steric hindrance            | ~30          | [8]          |
| <b>Insertion</b> |             |                             |              |              |
| 185X             | 539insTG    | Early termination           | n.r.         | [13,16]      |
| 351X             | 827insG     | Early termination           | None         | [13]         |
| <b>Deletion</b>  |             |                             |              |              |
| 92X              | 255delCA    | Early termination           | None         | [9]          |
| 350X             | 1043delTG   | Early termination           | n.r.         | [13]         |
| <b>Nonsense</b>  |             |                             |              |              |
| 387X             | 1161G>A     | Eight amino acid truncation | 75           | [17]         |

**REFERENCES**

- Komoto, J., Yamada, T., Takata, Y., Markham, G. D. and Takusagawa, F. (2004) Crystal structure of the S-adenosylmethionine synthetase ternary complex: a novel catalytic mechanism of S-adenosylmethionine synthesis from ATP and Met. *Biochemistry* **43**, 1821–1831
- Fu, Z., Hu, Y., Markham, G. D. and Takusagawa, F. (1996) Flexible loop in the structure of S-adenosylmethionine synthetase crystallized in the tetragonal modification. *J. Biomol. Struct. Dyn.* **13**, 727–739
- Takusagawa, F., Kamitori, S. and Markham, G. D. (1996) Structure and function of S-adenosylmethionine synthetase: crystal structures of S-adenosylmethionine synthetase with ADP, BrADP, and PP<sub>1</sub> at 28 angstroms resolution. *Biochemistry* **35**, 2586–2596
- Takusagawa, F., Kamitori, S., Misaki, S. and Markham, G. D. (1996) Crystal structure of S-adenosylmethionine synthetase. *J. Biol. Chem.* **271**, 136–147
- Gonzalez, B., Pajares, M. A., Hermoso, J. A., Guiller, D., Guiller, G. and Sanz-Aparicio, J. (2003) Crystal structures of methionine adenosyltransferase complexed with substrates and products reveal the methionine-ATP recognition and give insights into the catalytic mechanism. *J. Mol. Biol.* **331**, 407–416
- Gonzalez, B., Pajares, M. A., Hermoso, J. A., Alvarez, L., Garrido, F., Sufrin, J. R. and Sanz-Aparicio, J. (2000) The crystal structure of tetrameric methionine adenosyltransferase from rat liver reveals the methionine-binding site. *J. Mol. Biol.* **300**, 363–375
- Linnebank, M., Lagler, F., Muntau, A. C., Roschinger, W., Olgemoller, B., Fowler, B. and Koch, H. G. (2005) Methionine adenosyltransferase (MAT) I/III deficiency with concurrent hyperhomocysteinaemia: two novel cases. *J. Inher. Metab. Dis.* **28**, 1167–1168
- Fernandez-Irigoyen, J., Santamaria, E., Chien, Y. H., Hwu, W. L., Korman, S. H., Faghfoury, H., Schulze, A., Hoganson, G. E., Stabler, S. P., Allen, R. H. et al. (2010) Enzymatic activity of methionine adenosyltransferase variants identified in patients with persistent hypermethioninemia. *Mol. Genet. Metab.* **101**, 172–177
- Chamberlin, M. E., Ubagai, T., Mudd, S. H., Thomas, J., Pao, V. Y., Nguyen, T. K., Levy, H. L., Greene, C., Freehauf, C. and Chou, J. Y. (2000) Methionine adenosyltransferase I/III deficiency: novel mutations and clinical variations. *Am. J. Hum. Genet.* **66**, 347–355
- Ubagai, T., Lei, K. J., Huang, S., Mudd, S. H., Levy, H. L. and Chou, J. Y. (1995) Molecular mechanisms of an inborn error of methionine pathway. Methionine adenosyltransferase deficiency. *J. Clin. Invest.* **96**, 1943–1947
- Chien, Y. H., Chiang, S. C., Huang, A. and Hwu, W. L. (2005) Spectrum of hypermethioninemia in neonatal screening. *Early Hum. Dev.* **81**, 529–533
- Tada, H., Takanashi, J., Barkovich, A. J., Yamamoto, S. and Kohno, Y. (2004) Reversible white matter lesion in methionine adenosyltransferase I/III deficiency. *AJNR Am. J. Neuroradiol.* **25**, 1843–1845
- Chamberlin, M. E., Ubagai, T., Mudd, S. H., Wilson, W. G., Leonard, J. V. and Chou, J. Y. (1996) Demyelination of the brain is associated with methionine adenosyltransferase I/III deficiency. *J. Clin. Invest.* **98**, 1021–1027
- Nagao, M. and Oyanagi, K. (1997) Genetic analysis of isolated persistent hypermethioninemia with dominant inheritance. *Acta Paediatr. Jpn.* **39**, 601–606
- Ito, M., Kotani, Y., Matsuda, J., Yokota, I., Naito, E., Mori, K. and Kuroda, Y. (2003) A methionine adenosyltransferase (MAT) deficiency patient treated with diet therapy. *J. Inher. Metab. Dis.* **26**, 76
- Hazelwood, S., Bernardini, I., Shotelersuk, V., Tangerman, A., Guo, J., Mudd, H. and Gahl, W. A. (1998) Normal brain myelination in a patient homozygous for a mutation that encodes a severely truncated methionine adenosyltransferase I/III. *Am. J. Med. Genet.* **75**, 395–400
- Kim, S. Z., Santamaria, E., Jeong, T. E., Levy, H. L., Mato, J. M., Corrales, F. J. and Mudd, S. H. (2002) Methionine adenosyltransferase I/III deficiency: two Korean compound heterozygous siblings with a novel mutation. *J. Inher. Metab. Dis.* **25**, 661–671

Received 16 October 2012/11 February 2013; accepted 20 February 2013  
 Published as BJ Immediate Publication 20 February 2013, doi:10.1042/BJ20121580
